# Supplementary material for: Adolescent time use and mental health: a cross-sectional, compositional analysis in the Millennium Cohort Study
Source: HighWire-hosted journal article supplement (doi:10.1136/bmjopen-2020-047189), 2021-10-01
Supplement: bmjopen-2020-047189supp001_data_supplement.pdf [file bmjopen-2020-047189supp001_data_supplement.pdf]

## Supplementary material

Table S1. Recoding of time-use diary entries into behavioural categories

| Category name                                       | Time-use diary: recorded activity                                                                                                                                                                                                                                                                                                                                                                                                                                                                                                                                                                                                                                                                                      |
|-----------------------------------------------------|------------------------------------------------------------------------------------------------------------------------------------------------------------------------------------------------------------------------------------------------------------------------------------------------------------------------------------------------------------------------------------------------------------------------------------------------------------------------------------------------------------------------------------------------------------------------------------------------------------------------------------------------------------------------------------------------------------------------|
| Sleep                                               | Sleeping and resting                                                                                                                                                                                                                                                                                                                                                                                                                                                                                                                                                                                                                                                                                                   |
| Physical activity                                   | Cycling; Individual ball games and training (e.g. tennis, badminton); Jogging, running, walking, hiking; Team ball games and training (e.g. football, hockey); Swimming and other water sports; Other exercise and sports, dancing, keeping fit, skiing, gymnastics; Travel by physically active means (walk, bike etc.)                                                                                                                                                                                                                                                                                                                                                                                               |
| School-related activities                           | Homework; In class; School breaks; School clubs; Detention                                                                                                                                                                                                                                                                                                                                                                                                                                                                                                                                                                                                                                                             |
| Hobbies and socialising                             | Attending live sporting events; Cinema, theatre, performance, gig etc.; Exhibition, museum, library, other cultural events; Shopping (including window shopping, hanging out at shopping centre); Speaking, socialising face-to-face; Volunteering; Religious activities (including going to places of worship, praying etc.); Did nothing, just relaxing, bored, waiting; Hobbies, arts and crafts, musical activities, writing stories, poetry etc.; Reading (not for school); Other activities not listed                                                                                                                                                                                                           |
| Electronic media                                    | Speaking on the phone (including Skype, video calls); Answering emails, instant messaging, texting; Browsing and updating social networking sites (e.g. Twitter, Facebook, BBM, Snapchat); General internet browsing, programming (not time on social networking sites); Listening to music, radio, iPod, other audio content; Playing electronic games and Apps; Watch TV, DVDs, downloaded videos                                                                                                                                                                                                                                                                                                                    |
| Domestic, personal care and work-related activities | Personal care (including taking a shower/bath, grooming, getting dressed etc.); Paid work (including paid babysitting and paid work for the family); Unpaid work for family or other non-household members (e.g. help in family business); Cooking, cleaning, and shopping for the household; Fixing things around the house, fixing bike, gardening; Looking after brothers, sisters, other children in the household; Looking after parent or other adult in the households (medical or personal care); Pet care; Eating or drinking in a restaurant or café; Eating a meal; Eating a snack or having a drink; Travel by bus, taxi, tube, plane; Travel by car, van (including vehicles owned by friends and family) |

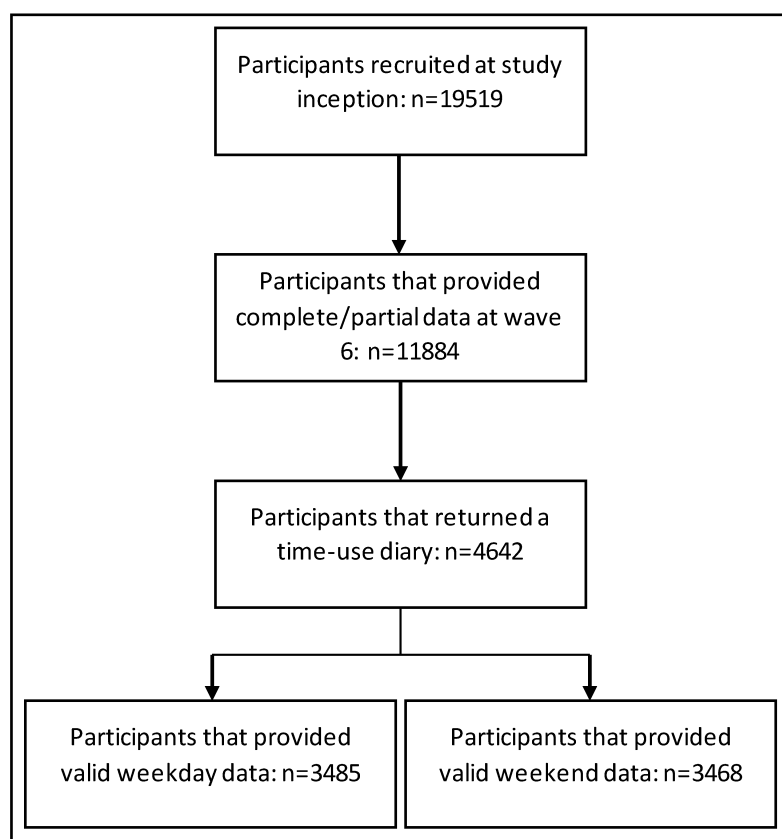

**Figure S1. Flow diagram of participant selection process.**
